# Supplementary material for: Geographical clustering and socioeconomic factors associated with hypoglycemic events requiring emergency assistance in Andalusia (Spain)
Source: HighWire-hosted journal article supplement (doi:10.1136/bmjdrc-2020-001731), 2021-01-01
Supplement: bmjdrc-2020-001731supp005_data_supplement.pdf [file bmjdrc-2020-001731supp005_data_supplement.pdf]

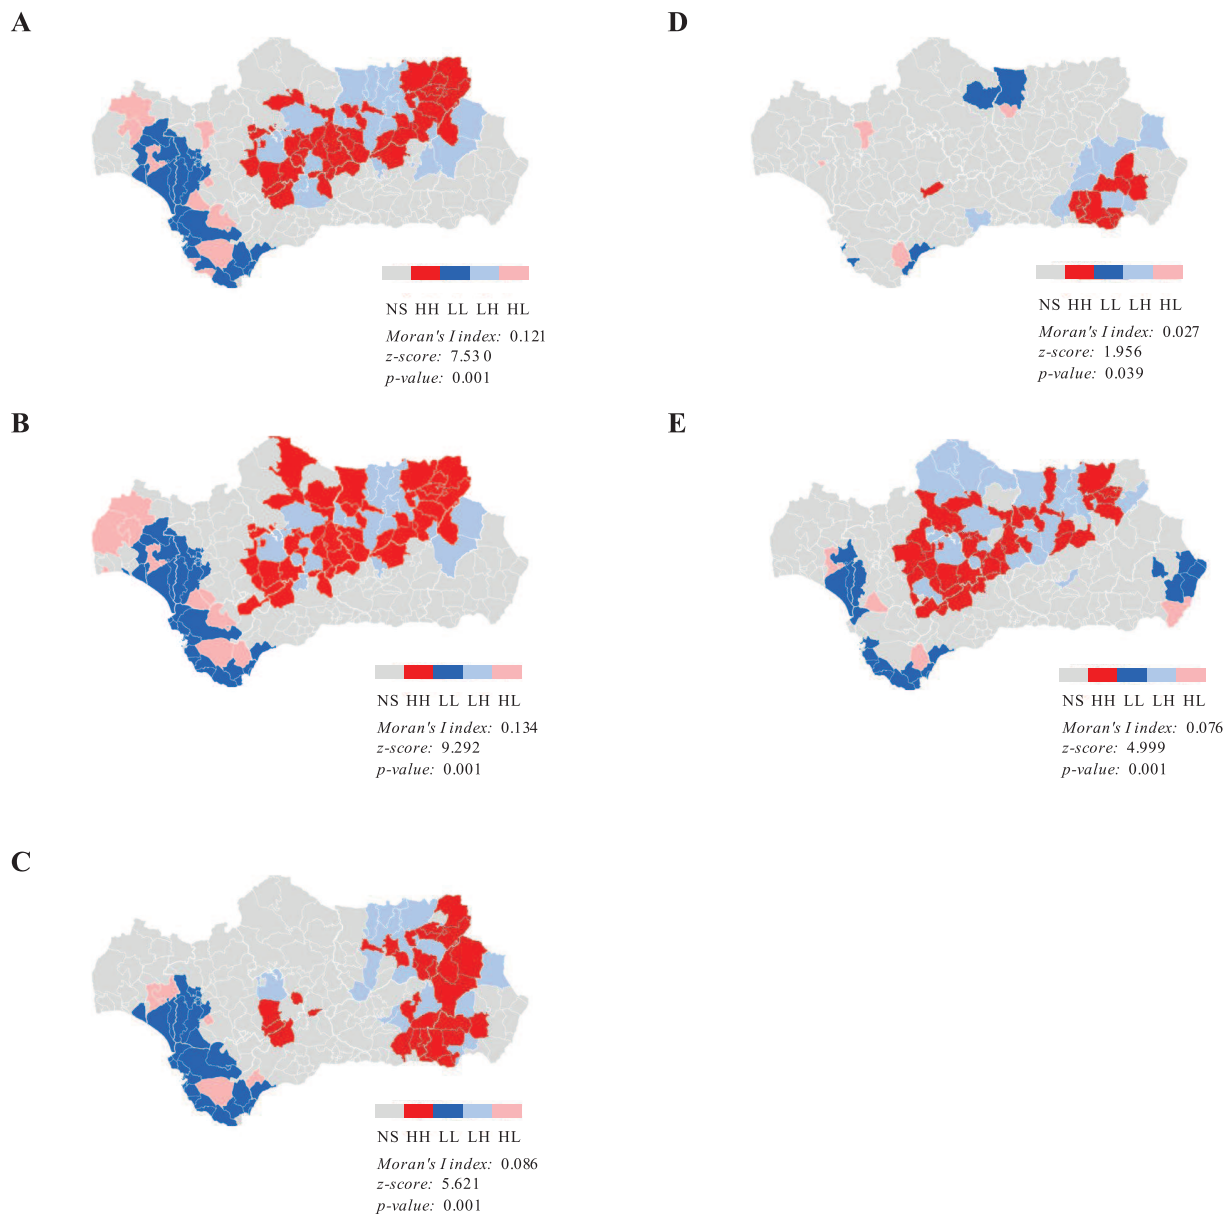

**Supplemental Figure 3.** Geographical distribution of illiterates per 100,000 inhabitants in the overall population (A), women (B), men (C), aged 16-64 years (D) and aged >64 years (E). It could not be obtained in individuals aged <16 years. HH, high-high cluster; HL, high-low cluster; LH, low-high cluster; LL, low-low cluster; NS, non-significant.
