# Supplementary material for: Geographical clustering and socioeconomic factors associated with hypoglycemic events requiring emergency assistance in Andalusia (Spain)
Source: HighWire-hosted journal article supplement (doi:10.1136/bmjdrc-2020-001731), 2021-01-01
Supplement: bmjdrc-2020-001731supp010_data_supplement.pdf [file bmjdrc-2020-001731supp010_data_supplement.pdf]

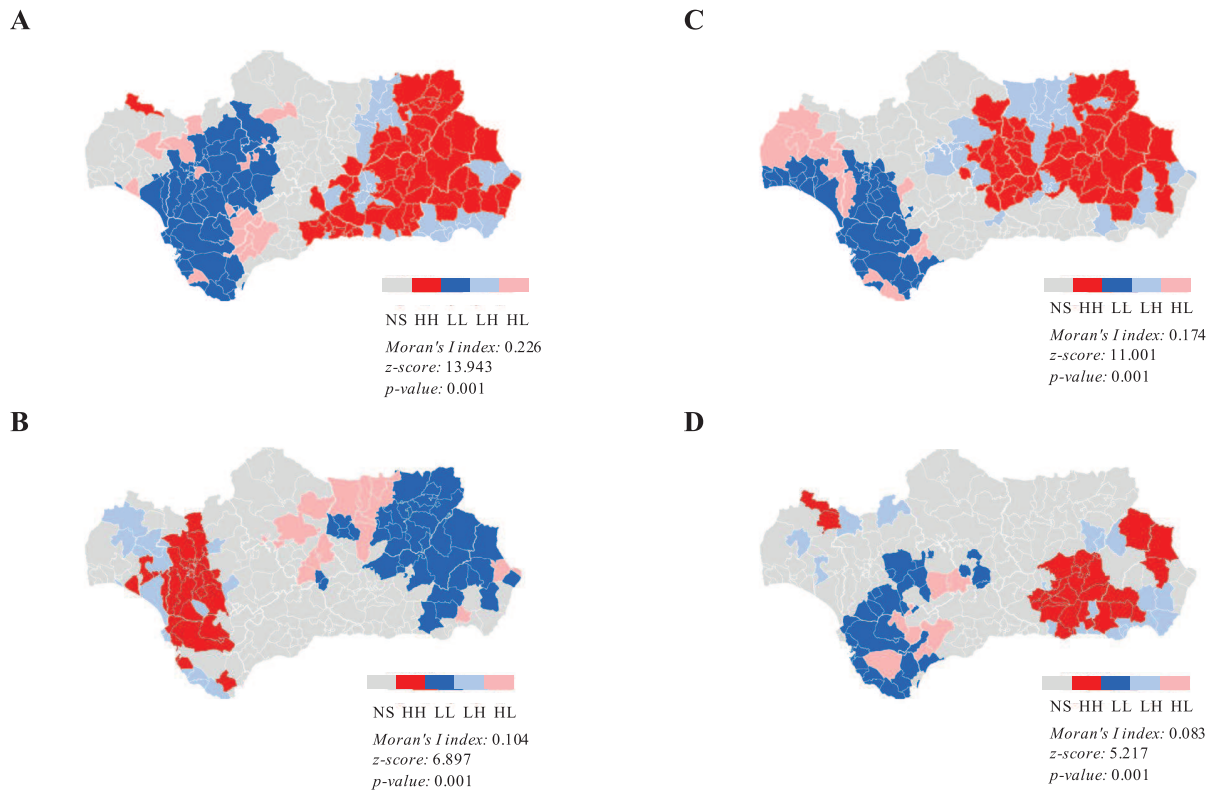

**Supplemental Figure 8.** Geographical distribution of single-person homes per 100,000 homes (A), homes with pending payments per 100,000 inhabitants (B), dependence index (C) and net income per inhabitant (euros) (D) in the overall population. They could not be obtained according to gender and age ranges. HH, high-high cluster; HL, high-low cluster; LH, low-high cluster; LL, low-low cluster; NS, non-significant.
